# Supplementary material for: Enzymatic Synthesis of α-Glucosyl-Baicalin through Transglucosylation via Cyclodextrin Glucanotransferase in Water
Source: MDPI journal article supplement (doi:10.3390/molecules28093891), 2023-05-05
Supplement: s1 [file s1]

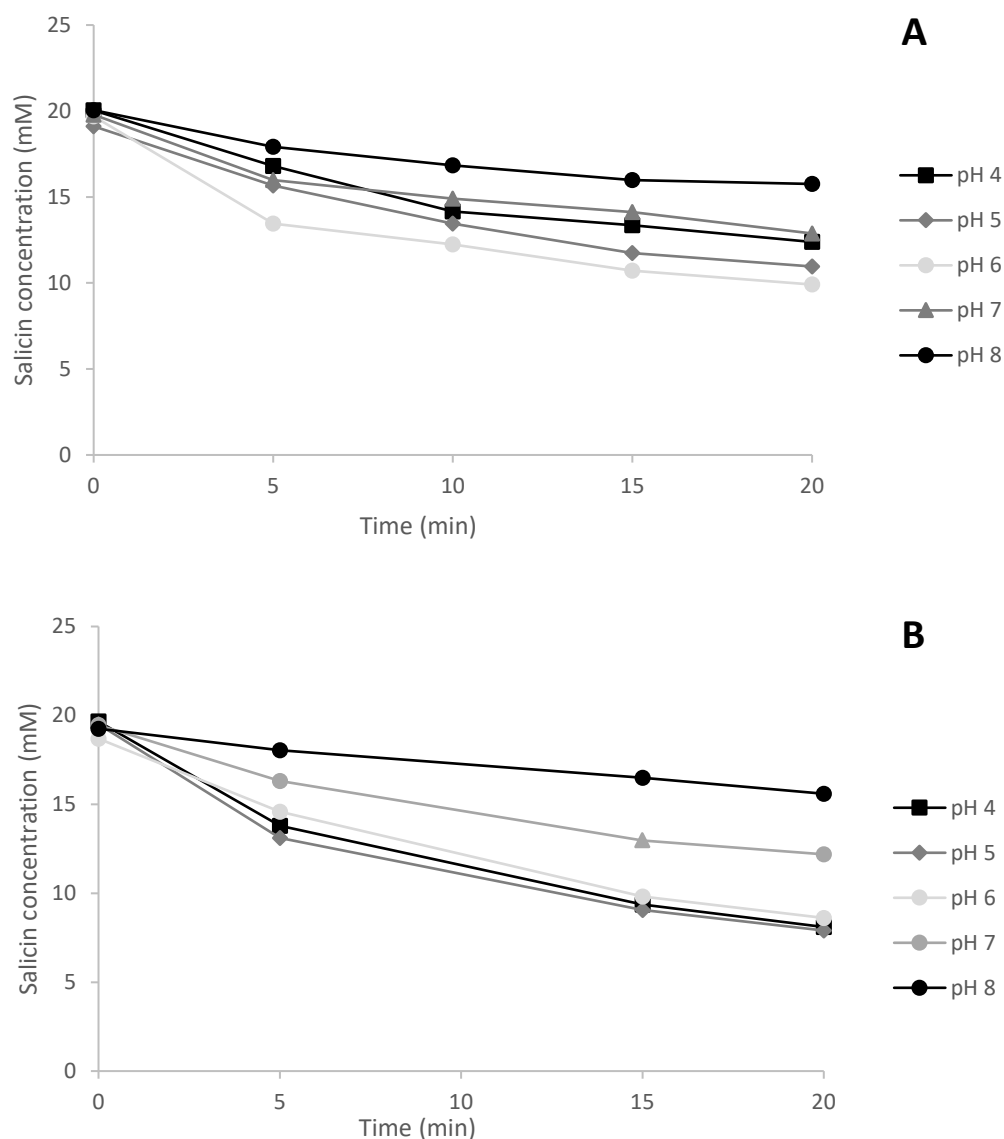

**Supplementary Data S1.** Influence of pH on CGTase Amano (A) and Toruzyme® 3.0L (B) transglucosylation activity using Salicin as substrate. Enzyme was 730 U/mL (w/w), salicin 20 mM,  $\alpha$ -cyclodextrin 20 mM and experiment was conducted at 40°C from pH 4.0 to 8.0. Salicin disappearance is measured to follow enzyme activity. In the range of pH 4-7, Toruzyme® activity is very similar while it decreased at 8. CGTase Amano activity was similar at pH 5-7 but decreased significantly outside this range.

$$(1) \text{ Baicalin glucosides Yield (\%)} = 92.65 - 15.79 \times \text{Bai} + 1.78 \times \text{CD} - 2.76 \times \text{pH} + 7.17 \times \text{Temp} + 6.17 \times \text{Enz} - 9.3 \times \text{Bai}^2 - 30.49 \times \text{pH}^2 + 13.3 \times \text{Bai} \times \text{pH} + 1.76 \times \text{Bai} \times \text{Enz} + 4.73 \times \text{Temp} \times \text{pH} + 5.2 \times \text{Enz} \times \text{pH}$$

$$(2) \text{ Total glucosides content (mM)} = 23.01 + 4.25 \text{ Bai} + 0.35 \text{ CD} + 0.77 \times \text{pH} + 1.7 \times \text{Temp} + 1.8 \times \text{Enz} - 3.55 \times \text{Bai}^2 - 8.85 \times \text{pH}^2 + 2.95 \times \text{Bai} \times \text{pH} + 1.14 \times \text{Bai} \times \text{pH}$$

**Supplementary Data S2.** Equations of models calculated using centered Central-Composite Face-Centered design and explaining the molar yield (1) of baicalin glucoside and the total baicalin glucoside content (2).

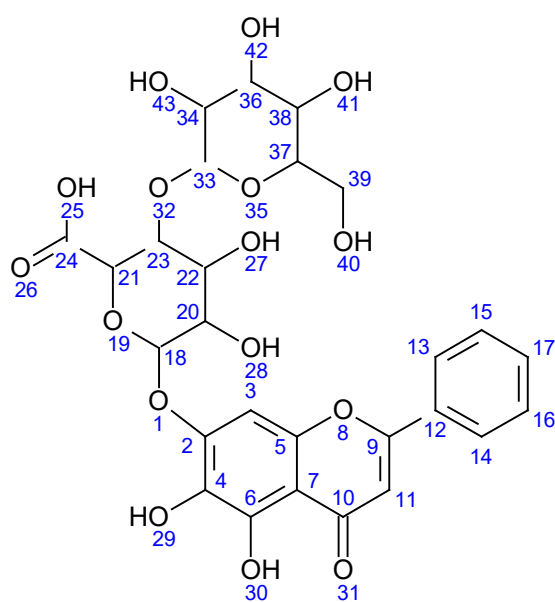

| Atom number | $\delta^{13}\text{C}$ (ppm) | $\delta^1\text{H}$ (ppm) |
|-------------|-----------------------------|--------------------------|
| 2           | 151.6                       | -                        |
| 3           | 93.9                        | 7.04                     |
| 4           | 131.2                       | -                        |
| 5           | 149.6                       | -                        |
| 6           | 147.1                       | -                        |
| 7           | 106.7                       | -                        |
| 9           | 163.8                       | -                        |
| 10          | 182.8                       | -                        |
| 11          | 104.9                       | 7.02                     |
| 12          | 132.5                       | -                        |
| 13,14       | 126.5                       | 8.07                     |
| 15,16       | 129.3                       | 7.61                     |
| 17          | 132.2                       | 7.62                     |
| 18          | 99.7                        | 5.33                     |
| 20          | 72.4                        | 3.50                     |
| 21          | 74.3                        | 4.27                     |
| 22          | 75.6                        | 3.65                     |
| 23          | 80.0                        | 3.66                     |
| 24          | 169.7                       | -                        |
| 33          | 100.8                       | 5.10                     |
| 34          | 72.8                        | 3.24                     |
| 36          | 73.7                        | 3.39                     |
| 37          | 73.2                        | 3.44                     |
| 38          | 69.2                        | 3.23                     |
| 39          | 73.2                        | 3.44                     |

**Supplementary Data S3.**  $^1\text{H}$  and  $^{13}\text{C}$  chemical shifts of baicalin monoglucoside from NMR experiments in  $\text{DMSO-}d_6$ .

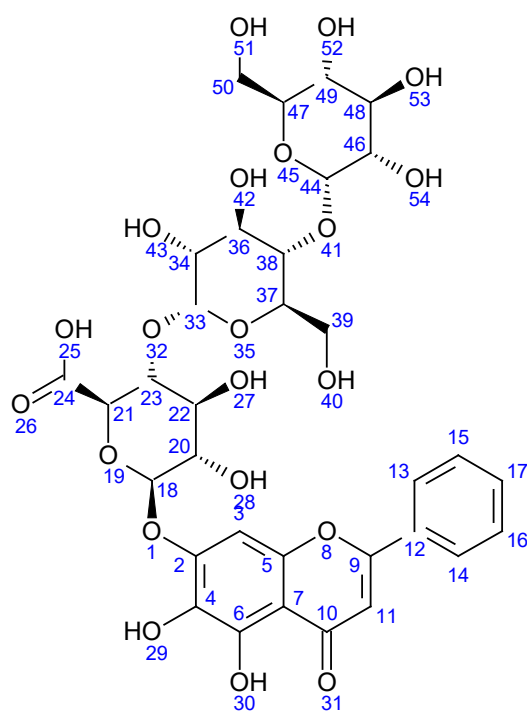

| Atom number | $\delta^{13}\text{C}$ (ppm) | $\delta^1\text{H}$ (ppm) |
|-------------|-----------------------------|--------------------------|
| 2           | 151.8                       | -                        |
| 3           | 94.4                        | 6.99                     |
| 4           | 131.5                       | -                        |
| 5           | 149.5                       | -                        |
| 6           | 147.2                       | -                        |
| 7           | 106.7                       | -                        |
| 9           | 164.0                       | -                        |
| 10          | 183.1                       | -                        |
| 11          | 105.2                       | 6.99                     |
| 12          | 131.3                       | -                        |
| 13,14       | 126.8                       | 8.07                     |
| 15,16       | 129.7                       | 7.6                      |
| 17          | 132.6                       | 7.61                     |
| 18          | 100.5                       | 5.23                     |
| 20          | 72.6                        | 3.48                     |
| 21          | 75.5                        | 4.16                     |
| 22          | 75.1                        | 3.68                     |
| 23          | 80.6                        | 3.70                     |
| 24          | 170.7                       | -                        |
| 33          | 99.7                        | 5.14                     |
| 34          | 72.3                        | 3.28                     |
| 36          | 73.6                        | 3.65                     |
| 37          | 71.6                        | 3.65                     |
| 38          | 79.7                        | 3.36                     |
| 39          | 60.5                        | 3.62                     |
| 44          | 101.2                       | 5.00                     |
| 46          | 73.0                        | 3.23                     |

---

|    |      |      |
|----|------|------|
| 47 | 73.9 | 3.49 |
| 48 | 73.9 | 3.40 |
| 49 | 70.4 | 3.07 |
| 50 | 61.2 | 3.62 |

---

**Supplementary Data S4.**  $^1\text{H}$  and  $^{13}\text{C}$  chemical shifts of baicalin diglucoside from NMR experiments in  $\text{DMSO-}d_6$ .
